# Supplementary material for: Utilization of CO2-captured poly(allylamine) as a polymer surfactant for nanoarchitecture production in a closed CO2 cycle
Source: Royal Society of Chemistry journal article supplement (doi:10.1039/d4su00121d), 2024-01-01
Supplement: d4su00121d1.pdf [file d4su00121d1.pdf]

Electronic Supplementary Information (ESI)

## Utilization of CO<sub>2</sub>-Captured Poly(allylamine) as a Polymer Surfactant for Nanoarchitecture Production in a Closed CO<sub>2</sub> Cycle

Eri Yoshida

*Department of Applied Chemistry and Life Science, Toyohashi University of Technology*

*1-1 Hibarigaoka, Tempaku-cho, Toyohashi 441-8580, Japan*

E-mail: yoshida.eri.gu@tut.jp

Content:

Supplementary Fig. S1: <sup>13</sup>C NMR of the CA-captured PAA and ammonium bicarbonate.

Supplementary Fig. S2: Variation in G<sub>1</sub>(τ) with time for the polymer solutions.

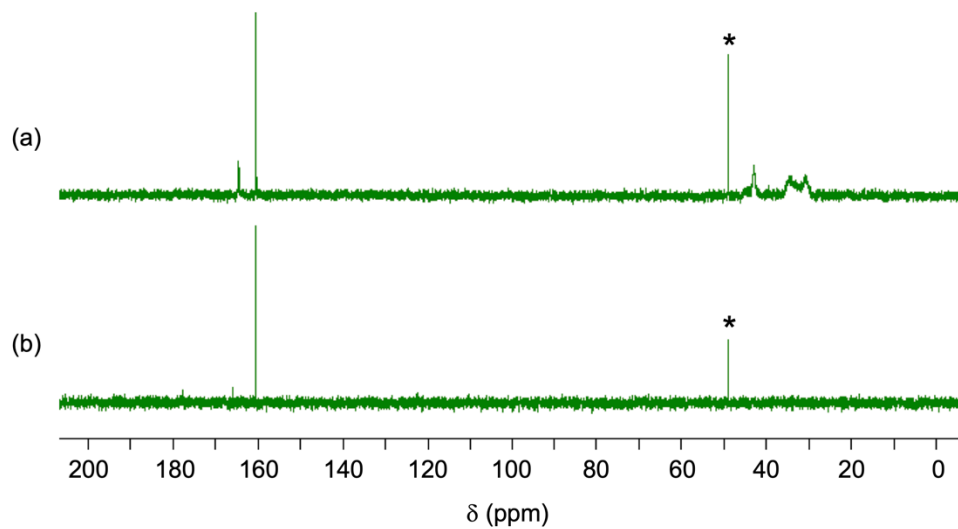

Fig. S1. <sup>13</sup>C NMR spectra of (a) the CA-captured PAA with  $M_w = 15,000$  and (b) ammonium bicarbonate ( $\text{NH}_4\text{HCO}_3$ ). Solvent:  $\text{D}_2\text{O}$ . \*  $\text{CH}_3\text{OH}$  standard

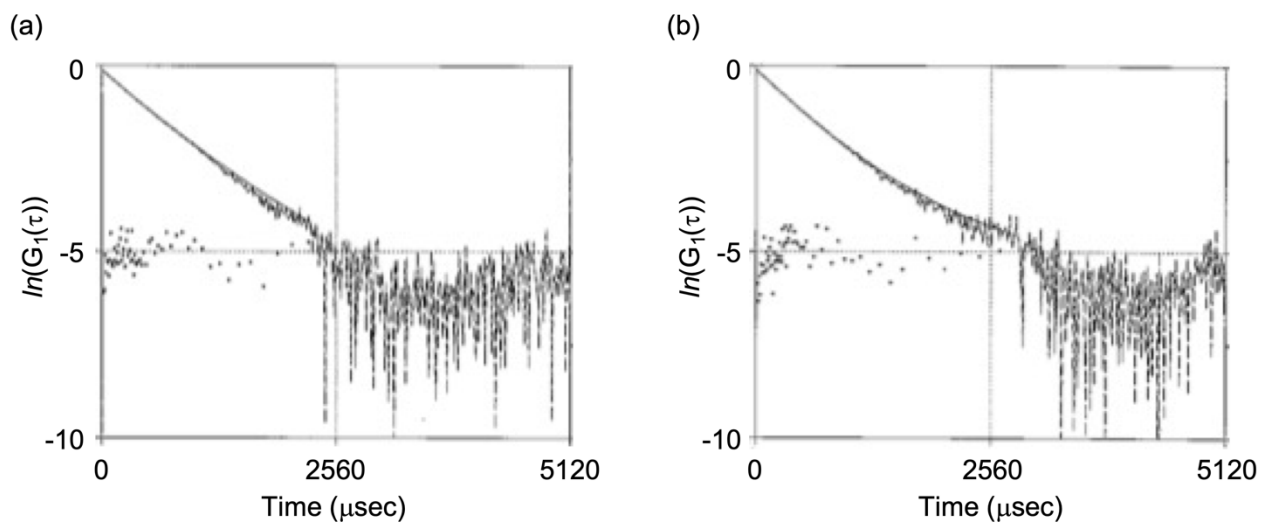

Fig. S2. Variation in  $G_1(\tau)$  with time for the PAA solution. (a)  $M_w = 5,000$  and (b) 1,600. SDS/AA = 0.5.  $[AA]_0 = 3.59 \times 10^{-3}$  mol/L
